# Supplementary material for: Relationship between HLA genetic variations, COVID-19 vaccine antibody response, and risk of breakthrough outcomes
Source: PubMed Central journal article supplement (PMC11091043; doi:10.1038/s41467-024-48339-5), 2024-05-13
Supplement: 41467_2024_48339_MOESM1_ESM.pdf [file 41467_2024_48339_MOESM1_ESM.pdf]

## Supplementary Materials

|                                                                                                                                                            |    |
|------------------------------------------------------------------------------------------------------------------------------------------------------------|----|
| Supplementary table 1 Baseline characteristics of participants at the time of receiving the first dose of COVID-19 vaccine in the prospective cohort. .... | 2  |
| Supplementary table 2 Baseline characteristics of HLA DQB1*06 carriers and non-carriers in the cross-sectional cohort.....                                 | 3  |
| Supplementary table 3 HLA alleles associated with COVID-19 vaccine antibody response in both discovery and validation datasets.....                        | 4  |
| Supplementary table 4 Association of the HLA genetic scores with COVID-19 vaccine antibody response.....                                                   | 5  |
| Supplementary table 5 The associations between individual HLA alleles, composite HLA genetic scores, and breakthrough COVID-19 outcomes .....              | 6  |
| Supplementary table 6 Sensitivity analysis of Mendelian randomisation estimation .....                                                                     | 7  |
| Supplementary figure 1 Manhattan plot of the genome-wide association study for COVID-19 vaccine antibody response .....                                    | 8  |
| Supplementary figure 2 HLA associations with COVID-19 vaccine antibody response among White and other ethnic participants.....                             | 9  |
| Supplementary figure 3 Distribution of the HLA genetic scores for COVID-19 vaccine antibody response.....                                                  | 10 |

**Supplementary table 1 Baseline characteristics of participants at the time of receiving the first dose of COVID-19 vaccine in the prospective cohort.**

|                                   | <b>All participants</b> |
|-----------------------------------|-------------------------|
| Number of recipients              | 357,806                 |
| Age, mean (SD)                    | 69.28 (7.99)            |
| Sex, n (%)                        |                         |
| Female                            | 197824 (55.3)           |
| Male                              | 159982 (44.7)           |
| Ethnicity                         |                         |
| White                             | 328557 (91.8)           |
| Other ethnic groups               | 29249 (8.2)             |
| Vaccine types, n (%) <sup>1</sup> |                         |
| ChAdOx1                           | 135237 (37.8)           |
| BNT162b2                          | 83202 (23.3)            |
| Unknown                           | 139367 (39.0)           |

**Supplementary table 2 Baseline characteristics of HLA DQB1\*06 carriers and non-carriers in the cross-sectional cohort**

|                                           | 1st-dose recipients |                      |       | 2nd-dose recipients |                      |       |
|-------------------------------------------|---------------------|----------------------|-------|---------------------|----------------------|-------|
|                                           | DQB1*06 carriers    | DQB1*06 non-carriers | SMD   | DQB1*06 carriers    | DQB1*06 non-carriers | SMD   |
| Number                                    | 61984               | 45191                |       | 39317               | 28508                |       |
| Age, mean (SD)                            | 67.26 (7.59)        | 67.28 (7.59)         | 0.002 | 71.19 (6.56)        | 71.26 (6.56)         | 0.011 |
| Age category, n (%)                       |                     |                      |       |                     |                      |       |
| 50-59 years                               | 24865 (40.1)        | 18007 (39.8)         | 0.007 | 26592 (67.6)        | 19339 (67.8)         | 0.009 |
| 60-69 years                               | 11567 (18.7)        | 8403 (18.6)          |       | 2985 (7.6)          | 2100 (7.4)           |       |
| >=70 years                                | 25552 (41.2)        | 18781 (41.6)         |       | 9740 (24.8)         | 7069 (24.8)          |       |
| Sex, n (%)                                |                     |                      |       |                     |                      |       |
| Female                                    | 34590 (55.8)        | 25171 (55.7)         | 0.002 | 22879 (58.2)        | 16538 (58.0)         | 0.004 |
| Male                                      | 27394 (44.2)        | 20020 (44.3)         |       | 16438 (41.8)        | 11970 (42.0)         |       |
| Ethnicity                                 |                     |                      |       |                     |                      |       |
| White                                     | 52372 (84.5)        | 38139 (84.4)         | 0.003 | 33007 (84.0)        | 23807 (83.5)         | 0.012 |
| Others                                    | 9612 (15.5)         | 7052 (15.6)          |       | 6310 (16.0)         | 4701 (16.5)          |       |
| Weeks since the latest vaccination, n (%) |                     |                      |       |                     |                      |       |
| 1 week                                    | 988 (1.6)           | 689 (1.5)            | 0.021 | 7609 (19.4)         | 5613 (19.7)          | 0.024 |
| 2 weeks                                   | 1709 (2.8)          | 1248 (2.8)           |       | 7448 (18.9)         | 5463 (19.2)          |       |
| 3 weeks                                   | 2613 (4.2)          | 1996 (4.4)           |       | 6205 (15.8)         | 4510 (15.8)          |       |
| 4 weeks                                   | 4051 (6.5)          | 3002 (6.6)           |       | 5198 (13.2)         | 3741 (13.1)          |       |
| 5 weeks                                   | 5286 (8.5)          | 3902 (8.6)           |       | 4074 (10.4)         | 2944 (10.3)          |       |
| 6 weeks                                   | 6040 (9.7)          | 4449 (9.8)           |       | 2899 (7.4)          | 2090 (7.3)           |       |
| 7 weeks                                   | 7192 (11.6)         | 5158 (11.4)          |       | 2030 (5.2)          | 1396 (4.9)           |       |
| 8 weeks                                   | 8611 (13.9)         | 6229 (13.8)          |       | 1447 (3.7)          | 991 (3.5)            |       |
| 9 weeks                                   | 8984 (14.5)         | 6629 (14.7)          |       | 1006 (2.6)          | 712 (2.5)            |       |
| 10 weeks                                  | 8552 (13.8)         | 6103 (13.5)          |       | 729 (1.9)           | 546 (1.9)            |       |
| 11 weeks                                  | 6511 (10.5)         | 4808 (10.6)          |       | 433 (1.1)           | 300 (1.1)            |       |
| 12 weeks                                  | 1447 (2.3)          | 978 (2.2)            |       | 239 (0.6)           | 202 (0.7)            |       |
| Vaccine types, n (%) <sup>1</sup>         |                     |                      |       |                     |                      |       |
| ChAdOx1                                   | 23039 (37.2)        | 16909 (37.4)         | 0.012 | 10824 (27.5)        | 7754 (27.2)          | 0.022 |
| BNT162b2                                  | 8893 (14.3)         | 6295 (13.9)          |       | 10316 (26.2)        | 7271 (25.5)          |       |
| Unknown                                   | 30052 (48.5)        | 21987 (48.7)         |       | 18177 (46.2)        | 13483 (47.3)         |       |

SMD, standardised mean difference

<sup>1</sup> Calculated based on a subgroup of participants who had complete linkage to primary care records for the information on COVID-19 vaccine types. The *P* value was calculated based on the Wald test.

**Supplementary table 3 HLA alleles associated with COVID-19 vaccine antibody response in both discovery and validation datasets**

| Significant HLA alleles <sup>1</sup>          | Discovery dataset |                       |          |                       |          | Validation dataset |                      |          |                      |          |                       |
|-----------------------------------------------|-------------------|-----------------------|----------|-----------------------|----------|--------------------|----------------------|----------|----------------------|----------|-----------------------|
|                                               | Coefficient       | Crude value           | <i>P</i> | FDR-corrected value   | <i>P</i> | Coefficient        | Crude value          | <i>P</i> | FDR-corrected value  | <i>P</i> | Association direction |
| Antibody response to the 1st-dose vaccination |                   |                       |          |                       |          |                    |                      |          |                      |          |                       |
| DQB1*06:04                                    | 0.213             | 4.2×10 <sup>-12</sup> |          | 1.1×10 <sup>-10</sup> |          | 0.384              | 5.5×10 <sup>-5</sup> |          | 2.6×10 <sup>-3</sup> |          | Positive              |
| DRB1*13:02                                    | 0.203             | 1.9×10 <sup>-14</sup> |          | 7.5×10 <sup>-13</sup> |          | 0.305              | 2.5×10 <sup>-4</sup> |          | 5.2×10 <sup>-3</sup> |          | Positive              |
| DRB3*03:01                                    | 0.204             | 6.4×10 <sup>-15</sup> |          | 4.3×10 <sup>-13</sup> |          | 0.275              | 9.5×10 <sup>-4</sup> |          | 7.4×10 <sup>-3</sup> |          | Positive              |
| DRB3*01:01                                    | 0.137             | 2.8×10 <sup>-22</sup> |          | 5.6×10 <sup>-20</sup> |          | 0.109              | 1.4×10 <sup>-2</sup> |          | 4.7×10 <sup>-2</sup> |          | Positive              |
| DRB1*03:01                                    | 0.110             | 1.4×10 <sup>-13</sup> |          | 4.7×10 <sup>-12</sup> |          | 0.146              | 1.6×10 <sup>-3</sup> |          | 9.4×10 <sup>-3</sup> |          | Positive              |
| DQB1*02:01                                    | 0.108             | 3.2×10 <sup>-13</sup> |          | 9.1×10 <sup>-12</sup> |          | 0.144              | 1.9×10 <sup>-3</sup> |          | 9.7×10 <sup>-3</sup> |          | Positive              |
| DQA1*01:02                                    | 0.077             | 1.3×10 <sup>-8</sup>  |          | 2.1×10 <sup>-7</sup>  |          | 0.139              | 7.8×10 <sup>-4</sup> |          | 7.3×10 <sup>-3</sup> |          | Positive              |
| DRB1*15:01                                    | 0.058             | 1.6×10 <sup>-4</sup>  |          | 1.1×10 <sup>-3</sup>  |          | 0.119              | 1.1×10 <sup>-2</sup> |          | 4.6×10 <sup>-2</sup> |          | Positive              |
| DRB5*01:01                                    | 0.055             | 3.1×10 <sup>-4</sup>  |          | 1.9×10 <sup>-3</sup>  |          | 0.116              | 1.4×10 <sup>-2</sup> |          | 4.7×10 <sup>-2</sup> |          | Positive              |
| DQB1*05:01                                    | -0.095            | 1.6×10 <sup>-8</sup>  |          | 2.3×10 <sup>-7</sup>  |          | -0.170             | 1.4×10 <sup>-3</sup> |          | 9.3×10 <sup>-3</sup> |          | Negative              |
| DRB1*01:01                                    | -0.078            | 3.8×10 <sup>-5</sup>  |          | 2.9×10 <sup>-4</sup>  |          | -0.175             | 4.0×10 <sup>-3</sup> |          | 1.9×10 <sup>-2</sup> |          | Negative              |
| DQA1*01:01                                    | -0.122            | 9.3×10 <sup>-15</sup> |          | 4.7×10 <sup>-13</sup> |          | -0.180             | 3.3×10 <sup>-4</sup> |          | 5.2×10 <sup>-3</sup> |          | Negative              |
| C*16:01                                       | -0.117            | 1.4×10 <sup>-5</sup>  |          | 1.1×10 <sup>-4</sup>  |          | -0.216             | 1.2×10 <sup>-2</sup> |          | 4.7×10 <sup>-2</sup> |          | Negative              |
| DPB1*10:01                                    | -0.157            | 3.1×10 <sup>-4</sup>  |          | 1.9×10 <sup>-3</sup>  |          | -0.519             | 6.4×10 <sup>-4</sup> |          | 7.3×10 <sup>-3</sup> |          | Negative              |
| Antibody response to the 2nd-dose vaccination |                   |                       |          |                       |          |                    |                      |          |                      |          |                       |
| A*03:01                                       | 0.081             | 3.0×10 <sup>-6</sup>  |          | 7.7×10 <sup>-5</sup>  |          | 0.168              | 1.2×10 <sup>-3</sup> |          | 1.5×10 <sup>-2</sup> |          | Positive              |
| DQA1*01:01                                    | -0.137            | 7.6×10 <sup>-16</sup> |          | 1.5×10 <sup>-13</sup> |          | -0.165             | 1.2×10 <sup>-3</sup> |          | 1.5×10 <sup>-2</sup> |          | Negative              |

<sup>1</sup>The alleles are ordered by the coefficient of the logistic regression model in the discovery dataset. FDR: false discovery rate. The *P* value was calculated based on the Wald test.

**Supplementary table 4 Association of the HLA genetic scores with COVID-19 vaccine antibody response**

| Category    | 1st-dose antibody response |                     |                     | 2nd-dose antibody response |                     |                     |
|-------------|----------------------------|---------------------|---------------------|----------------------------|---------------------|---------------------|
|             | Genetic score 1            | Genetic score 2     | Genetic score 3     | Genetic score 1            | Genetic score 2     | Genetic score 3     |
| Continuous* | 1.14 (1.13 to 1.16)        | 1.16 (1.14 to 1.18) | 1.17 (1.15 to 1.18) | 1.10 (1.08 to 1.11)        | 1.12 (1.10 to 1.14) | 1.14 (1.12 to 1.15) |
| Quintile 1  | 1 ref                      | 1 ref               | 1 ref               | 1 ref                      | 1 ref               | 1 ref               |
| Quintile 2  | 1.19 (1.14 to 1.25)        | 1.17 (1.12 to 1.23) | 1.16 (1.11 to 1.22) | 1.11 (1.06 to 1.17)        | 1.13 (1.07 to 1.18) | 1.09 (1.04 to 1.14) |
| Quintile 3  | 1.26 (1.21 to 1.32)        | 1.28 (1.22 to 1.34) | 1.30 (1.24 to 1.36) | 1.14 (1.09 to 1.20)        | 1.18 (1.12 to 1.24) | 1.21 (1.15 to 1.27) |
| Quintile 4  | 1.37 (1.30 to 1.43)        | 1.37 (1.31 to 1.44) | 1.38 (1.32 to 1.45) | 1.29 (1.23 to 1.36)        | 1.26 (1.20 to 1.32) | 1.26 (1.20 to 1.32) |
| Quintile 5  | 1.47 (1.41 to 1.54)        | 1.52 (1.45 to 1.59) | 1.54 (1.47 to 1.61) | 1.28 (1.22 to 1.34)        | 1.38 (1.32 to 1.46) | 1.39 (1.32 to 1.46) |

**Supplementary table 5 The associations between individual HLA alleles, composite HLA genetic scores, and breakthrough COVID-19 outcomes**

|                                                              | Hazard ratio (95% CI) |                     |
|--------------------------------------------------------------|-----------------------|---------------------|
|                                                              | COVID-19 infection    | Severe COVID-19     |
| Individual HLA alleles                                       |                       |                     |
| A*03:01                                                      | 0.97 (0.94 to 1.00)   | 0.96 (0.86 to 1.07) |
| C*16:01                                                      | 0.98 (0.93 to 1.03)   | 0.99 (0.82 to 1.20) |
| DPB1*10:01                                                   | 1.07 (0.99 to 1.16)   | 1.00 (0.74 to 1.35) |
| DQA1*01:01                                                   | 1.03 (1.00 to 1.06)   | 1.10 (0.99 to 1.22) |
| DQA1*01:02                                                   | 0.98 (0.96 to 1.01)   | 0.95 (0.86 to 1.05) |
| DQB1*06:04                                                   | 0.94 (0.88 to 1.01)   | 0.90 (0.70 to 1.15) |
| DRB3*01:01                                                   | 0.98 (0.95 to 1.01)   | 0.91 (0.80 to 1.00) |
| Continuous genetic score for the 1st-dose antibody response  |                       |                     |
|                                                              | 1.02 (0.99 to 1.05)   | 0.89 (0.82 to 0.98) |
| Continuous genetic score for the 2nd-dose antibody response  |                       |                     |
|                                                              | 0.94 (0.90 to 0.98)   | 0.87 (0.76 to 0.99) |
| Categorical genetic score for the 1st-dose antibody response |                       |                     |
| Reference: the highest 25%-100%                              | 1                     | 1                   |
| The lowest 25%                                               | NC                    | 1.06 (0.94 to 1.20) |
| The lowest 10%                                               | NC                    | 1.16 (0.97 to 1.37) |
| The lowest 5%                                                | NC                    | 1.26 (1.01 to 1.58) |
| Categorical genetic score for the 2nd-dose antibody response |                       |                     |
| Reference: the highest 25%-100%                              | 1                     | 1                   |
| The lowest 25%                                               | 1.04 (1.01 to 1.08)   | 1.05 (0.93 to 1.19) |
| The lowest 10%                                               | 1.05 (1.00 to 1.11)   | 1.16 (0.98 to 1.38) |
| The lowest 5%                                                | 1.05 (0.98 to 1.12)   | 1.34 (1.08 to 1.67) |

NC, Not calculated due to the lack of statistical significance for the continuous genetic score.

**Supplementary table 6 Sensitivity analysis of Mendelian randomisation estimation**

| <b>Exposure</b>   |          | <b>Methods</b>            | <b>Number of HLA alleles</b> | <b>COVID-19 infection</b> | <b>Severe COVID-19</b>   |
|-------------------|----------|---------------------------|------------------------------|---------------------------|--------------------------|
| 1st-dose response | antibody | MR Egger                  | 24                           | 11.19 (-5.39 to 25.16)    | 52.82 (14.14 to 74.08)   |
|                   |          | Weighted median           | 24                           | 14.69 (5.95 to 22.62)     | 46.90 (25.50 to 62.15)   |
|                   |          | Inverse-variance weighted | 24                           | 14.51 (8.38 to 20.23)     | 41.13 (24.64 to 54.00)   |
|                   |          | Simple mode               | 24                           | 17.73 (4.69 to 28.98)     | 46.10 (11.97 to 67.00)   |
|                   |          | Weighted mode             | 24                           | 15.20 (3.64 to 25.38)     | 47.39 (20.86 to 65.03)   |
| 2nd-dose response | antibody | MR Egger                  | 4                            | -2.06 (-139.77 to 56.56)  | 64.88 (-622.50 to 98.29) |
|                   |          | Weighted median           | 4                            | 20.08 (5.35 to 32.52)     | 49.51 (10.11 to 71.64)   |
|                   |          | Inverse-variance weighted | 4                            | 21.34 (9.29 to 31.78)     | 46.56 (12.09 to 67.51)   |
|                   |          | Simple mode               | 4                            | 20.46 (0.81 to 36.22)     | 48.91 (-12.29 to 76.75)  |
|                   |          | Weighted mode             | 4                            | 19.58 (2.14 to 33.92)     | 50.07 (2.28 to 74.49)    |

### Supplementary figure 1 Manhattan plot of the genome-wide association study for COVID-19 vaccine antibody response

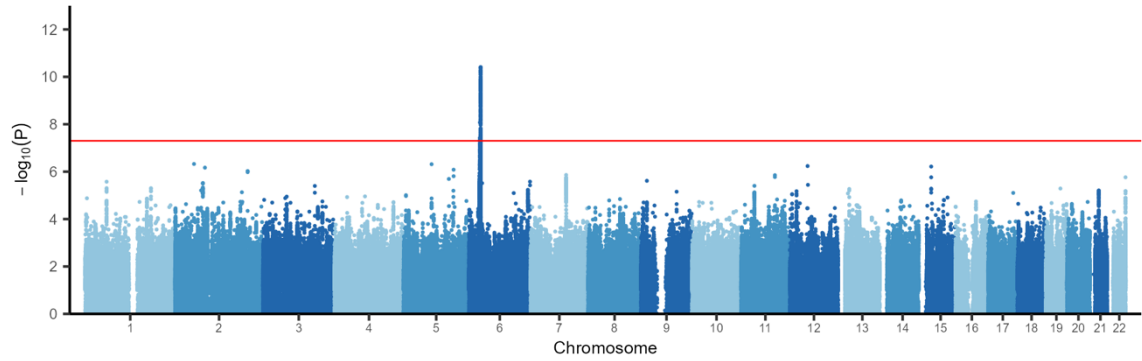

Antibody response to the 1st-dose

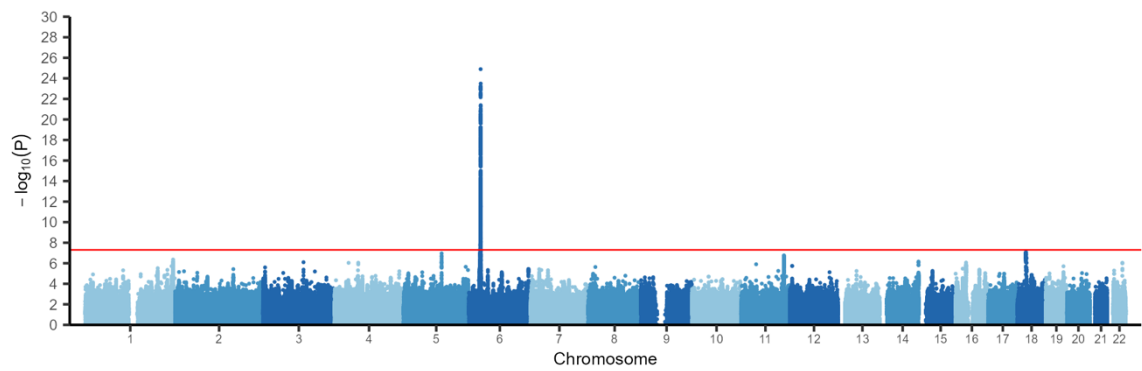

Antibody response to the 2nd-dose



### Supplementary figure 2 HLA associations with COVID-19 vaccine antibody response among White and other ethnic participants

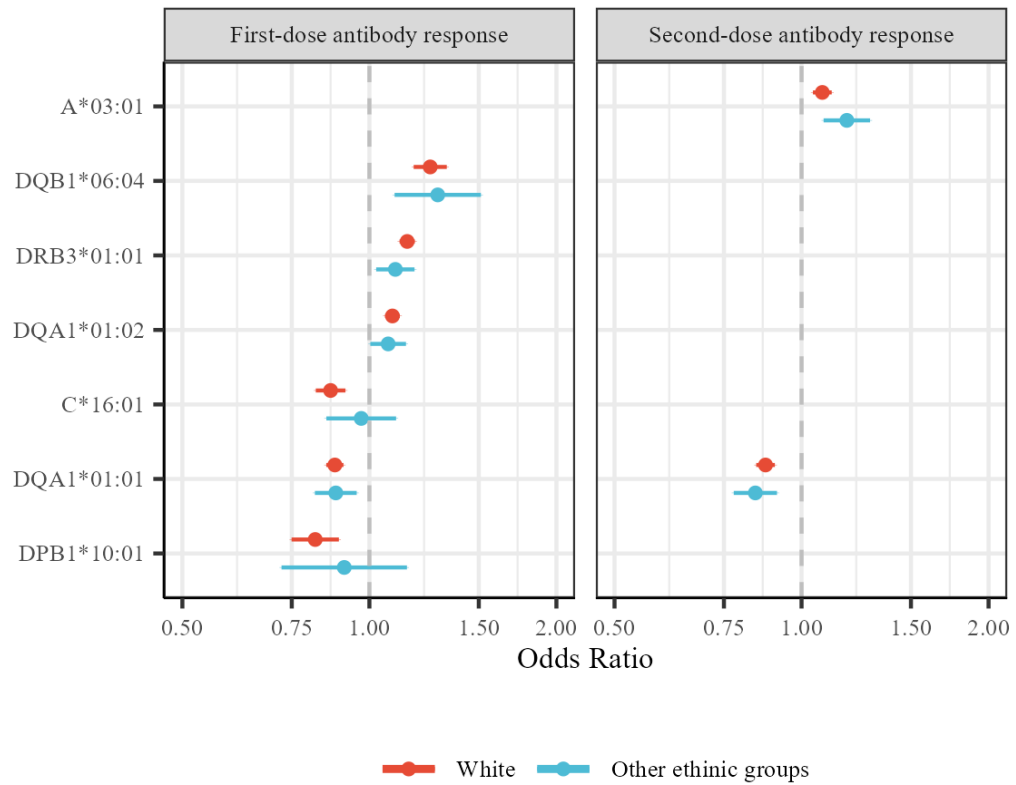

### Supplementary figure 3 Distribution of the HLA genetic scores for COVID-19 vaccine antibody response

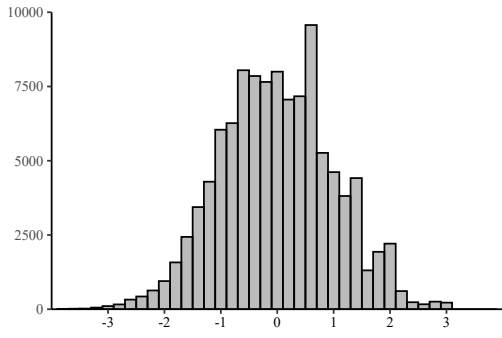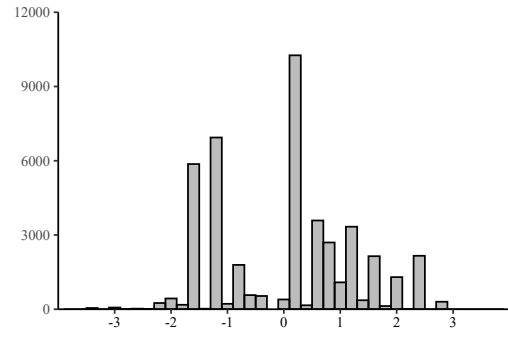

Genetic score 1

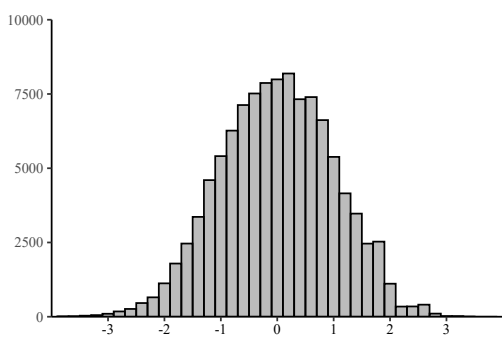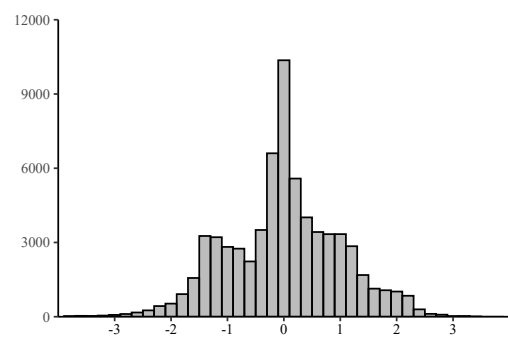

Genetic score 2

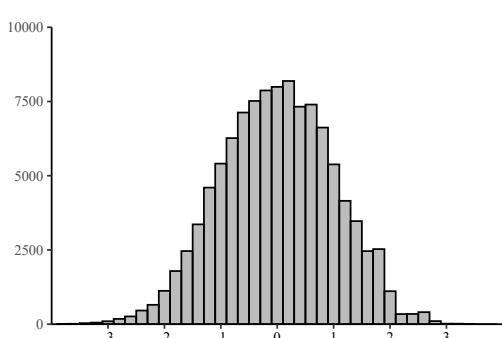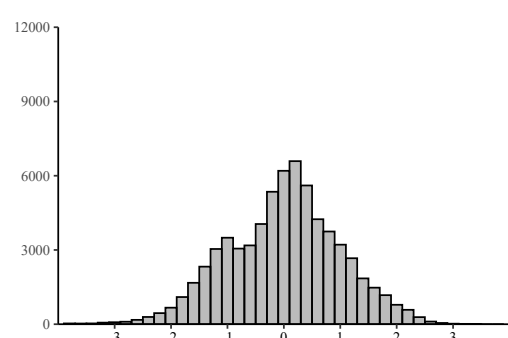

Genetic score 3

1st-dose antibody response

2nd-dose antibody response
